# Supplementary material for: Exploring the in vitro potential of royal jelly against glioblastoma and neuroblastoma: impact on cell proliferation, apoptosis, cell cycle, and the biomolecular content
Source: Royal Society of Chemistry journal article supplement (doi:10.1039/d3an01840g), 2024-01-01
Supplement: d3an01840g1.pdf [file d3an01840g1.pdf]

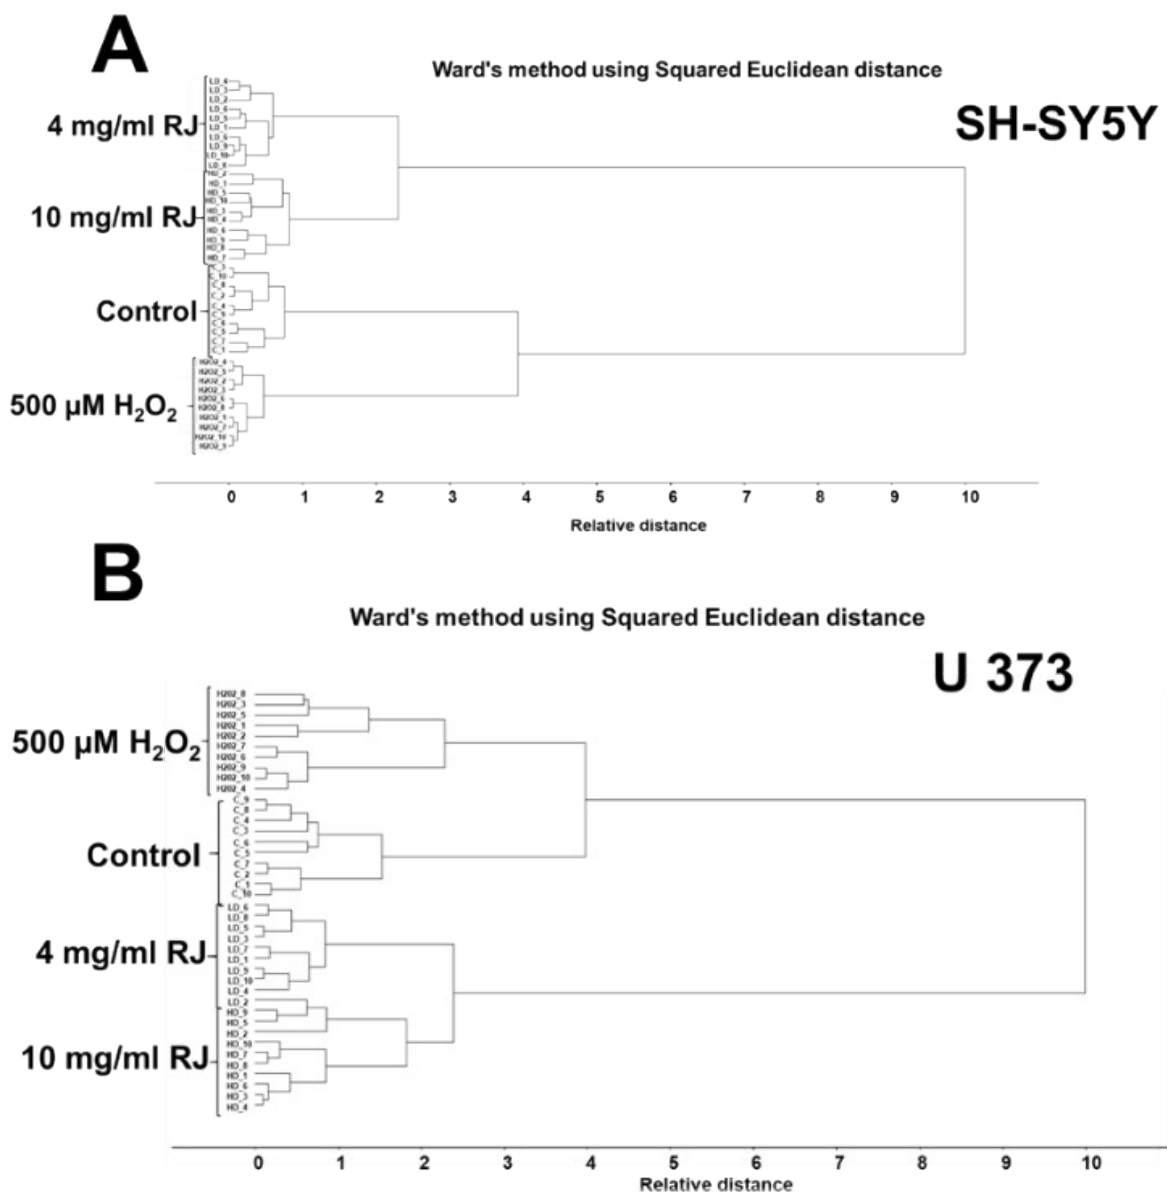

**Supplementary Fig. 1** HCA dendrogram analysis of collected IR spectra from SH-SY5Y-human neuroblastoma (a) and U373-human glioblastoma (b) for control, 500  $\mu$ M H<sub>2</sub>O<sub>2</sub>, low dose (4 mg/ml) and high dose (10 mg/ml) of royal jelly (RJ)-treated groups

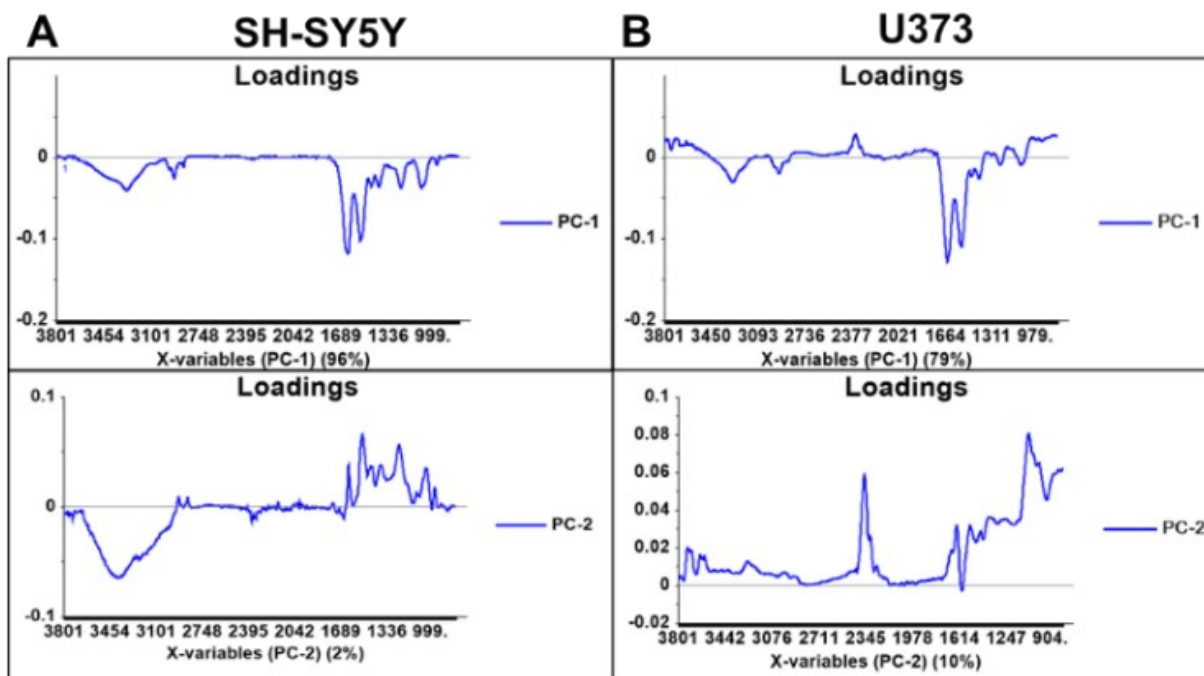

**Supplementary Fig. 2** PCA loading plots for control, 500  $\mu\text{M}$   $\text{H}_2\text{O}_2$ , low dose (4 mg/ml) and high dose (10 mg/ml) royal jelly (RJ)-treated groups of SH-SY5Y-human neuroblastoma (a) and U373-human glioblastoma (b).

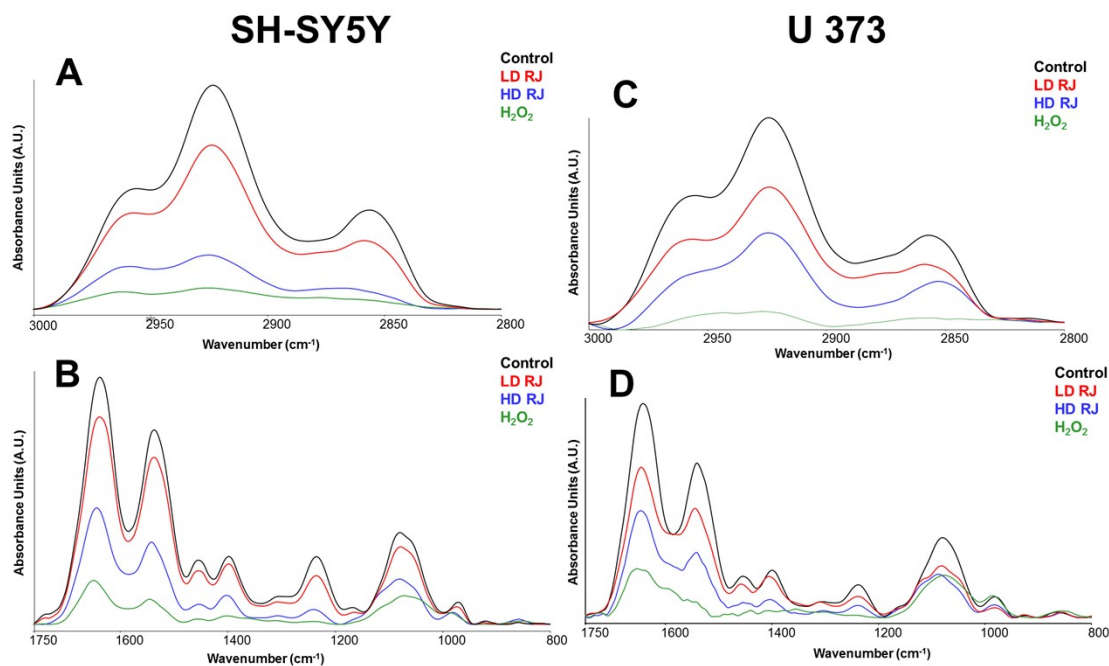

**Supplementary Fig. 3** The representative spectra of control, 500  $\mu\text{M}$   $\text{H}_2\text{O}_2$ , low dose (4 mg/ml) and high dose (10 mg/ml) of royal jelly (RJ)-treated groups for SH-SY5Y-human neuroblastoma (a,b) and U373-human glioblastoma (c,d) cells in the A) 3000-2800  $\text{cm}^{-1}$  and B) 1750-800  $\text{cm}^{-1}$  spectral regions.

**Supplementary Table 1.** Quantitative spectral analysis and their indications.

| <b>Band area/ area ratio</b>                               | <b>Indications</b>                            |
|------------------------------------------------------------|-----------------------------------------------|
| $A_{2926}$                                                 | Saturated lipid concentration                 |
| $A_{2926} / A_{2964}$                                      | Acyl chain length of fatty acids              |
| $A_{1741}$                                                 | Triglycerides-cholesterol ester concentration |
| $A_{1638}$                                                 | Protein concentration                         |
| $(A_{2950} + A_{2920}) / (A_{1654} + A_{1623} + A_{1534})$ | Total lipid/Total protein                     |
| $A_{1638} / A_{1539}$                                      | Protein structural and conformational changes |
| $A_{1238} / A_{2964}$                                      | Protein phosphorylation                       |
| $A_{1741} / A_{1638}$                                      | Protein carbonylation                         |
| $A_{1168}$                                                 | DNA concentration                             |
| $A_{970}$                                                  | RNA concentration                             |
